# Supplementary material for: Detection of falsified clopidogrel in the presence of excipients using voltammetry
Source: Royal Society of Chemistry journal article supplement (doi:10.1039/d1ay01602d), 2021-01-01

## Supplementary Information

### Detection of falsified clopidogrel in the presence of excipients using voltammetry

**Supplementary Figure 1.** Entire MIR spectra for raw powder of clopidogrel, a powdered commercial tablet, a powdered tablet diluted with lactose and a lactose powder

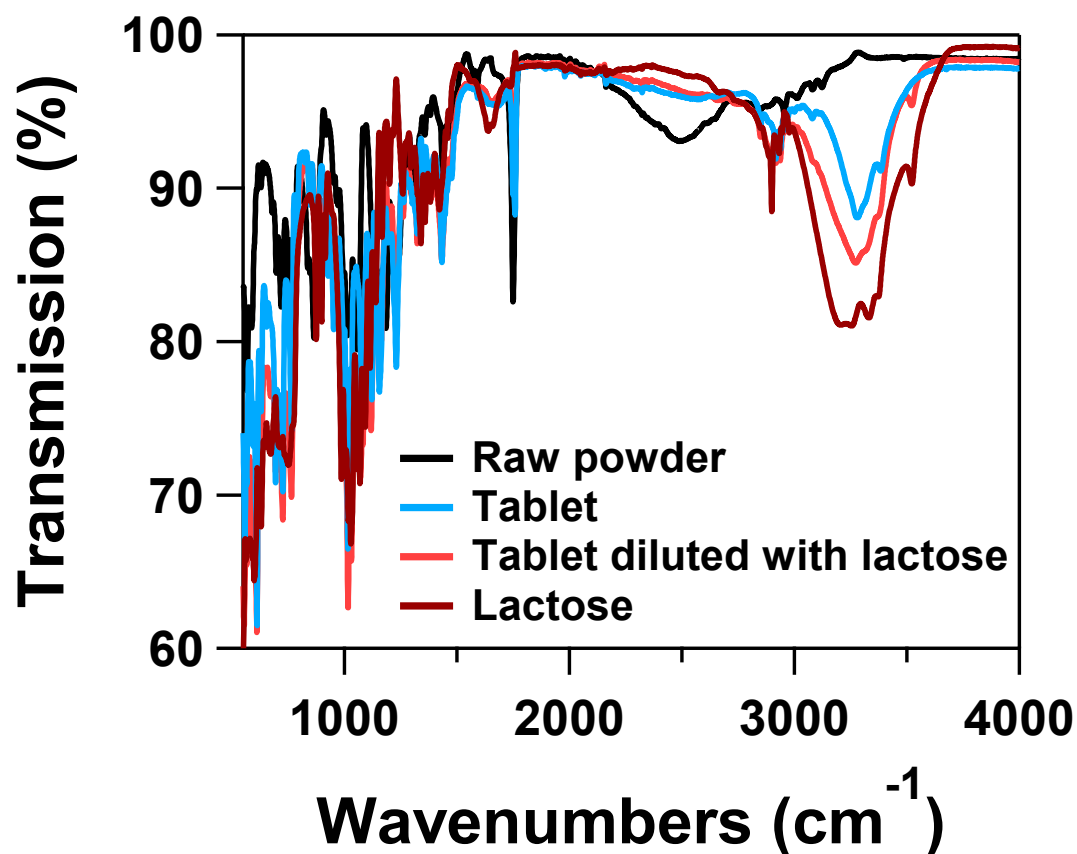

Supplement: d1ay01602d1.pdf [file d1ay01602d1.pdf]
